# Supplementary material for: A fluorescent probe based on an enhanced ICT effect for Hg2+ detection and cell imaging
Source: Royal Society of Chemistry journal article supplement (doi:10.1039/d3ay00544e), 2023-01-01
Supplement: d3ay00544e1.pdf [file d3ay00544e1.pdf]

## Supporting Information

# A fluorescent probe based on enhanced ICT effect for Hg<sup>2+</sup> detection and cell imaging

Shuchen Pei<sup>a</sup>, Chaozheng Li<sup>a</sup>, Xinyu Pei<sup>a</sup>, Xiangyang Zhang<sup>b</sup>, Yuting Chi<sup>a</sup>, Wenhong Zeng<sup>a</sup>, Yuanyuan Zhang<sup>c</sup>, Xiaoling Liao<sup>\*c</sup> and Jun Chen<sup>\*a</sup>

<sup>a</sup> School of Chemistry and Chemical Engineering, Chongqing University of Science and Technology, Chongqing, 401331, China.

<sup>b</sup> College of Chemistry and Chemical Engineering, Hunan University of Arts and Science, Changde 415000, China

<sup>c</sup> School of Metallurgy and Materials Engineering, Chongqing University of Science and Technology, Chongqing, 401331, China.

\* Corresponding authors: E-mail address: wxchenjun@163.com

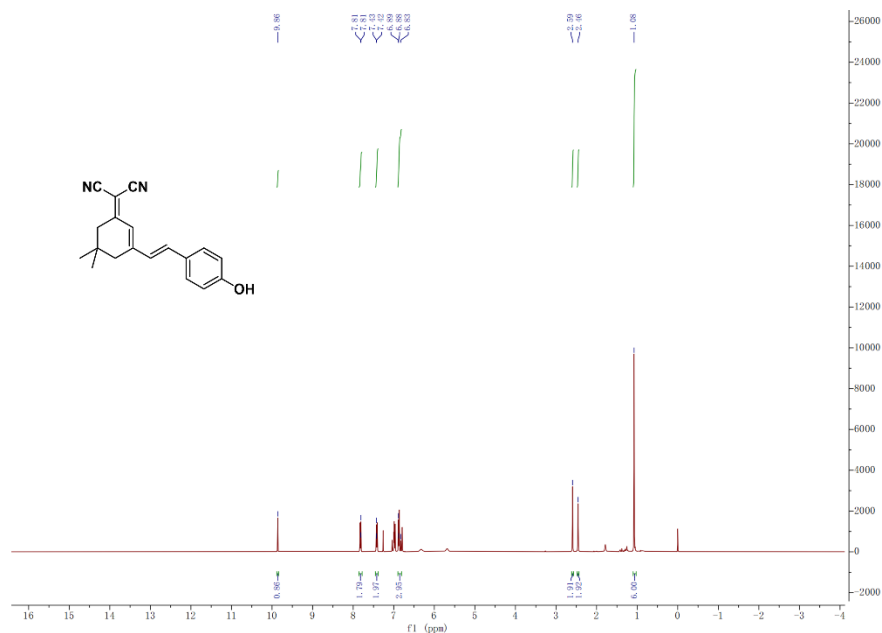

Fig. S1 <sup>1</sup>H NMR spectrum of YF-OH (400 MHz, CDCl<sub>3</sub>).

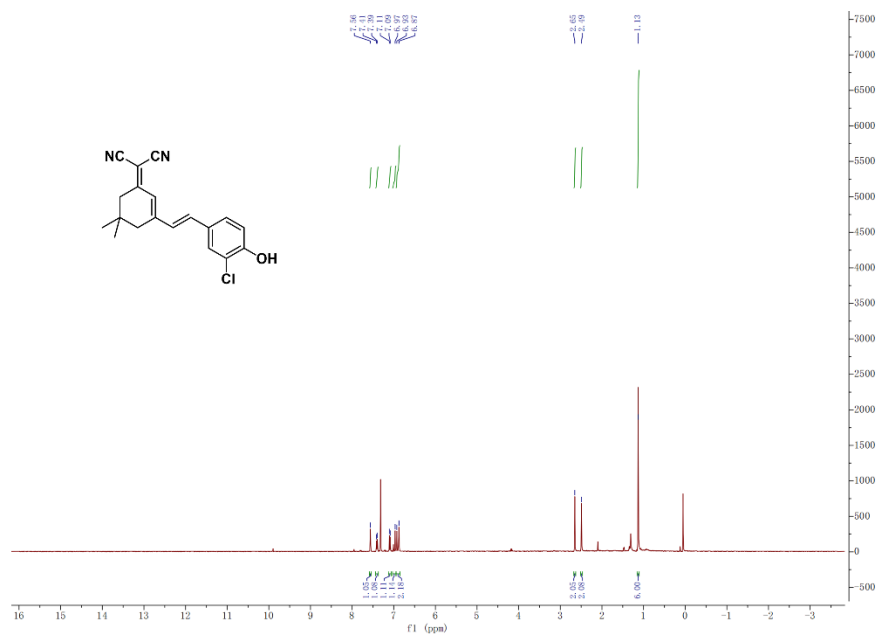

**Fig. S2** <sup>1</sup>H NMR spectrum of **YF-Cl-OH** (400 MHz, CDCl<sub>3</sub>).

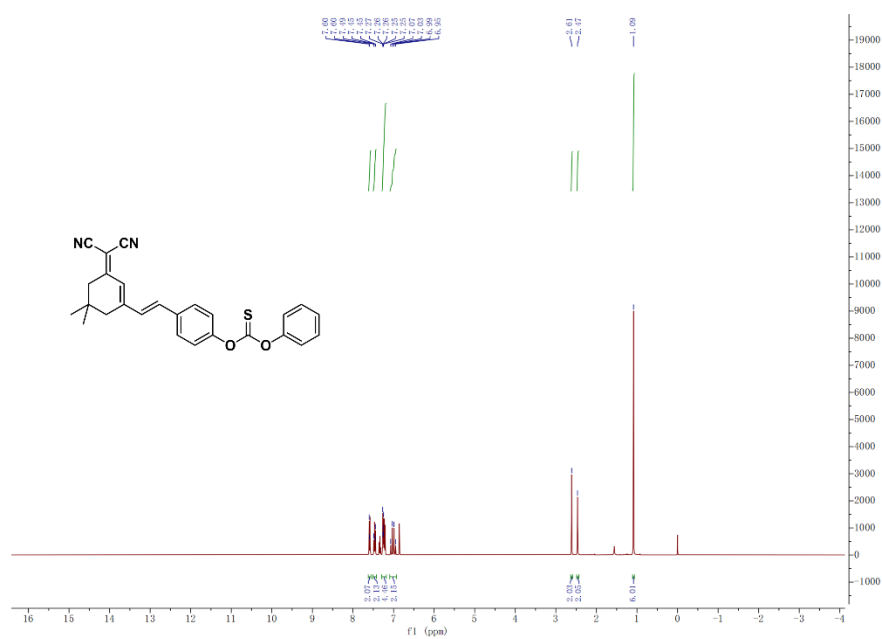

**Fig. S3** <sup>1</sup>H NMR spectrum of **YF-Hg** (400 MHz, CDCl<sub>3</sub>).



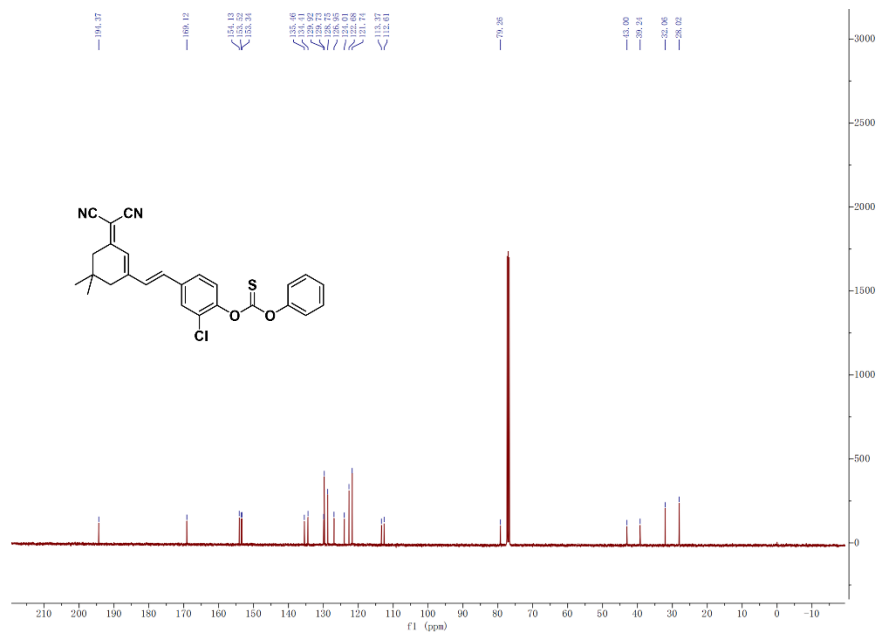

**Fig. S6**  $^{13}\text{C}$  NMR spectrum of **YF-Cl-Hg** (101 MHz,  $\text{CDCl}_3$ ).

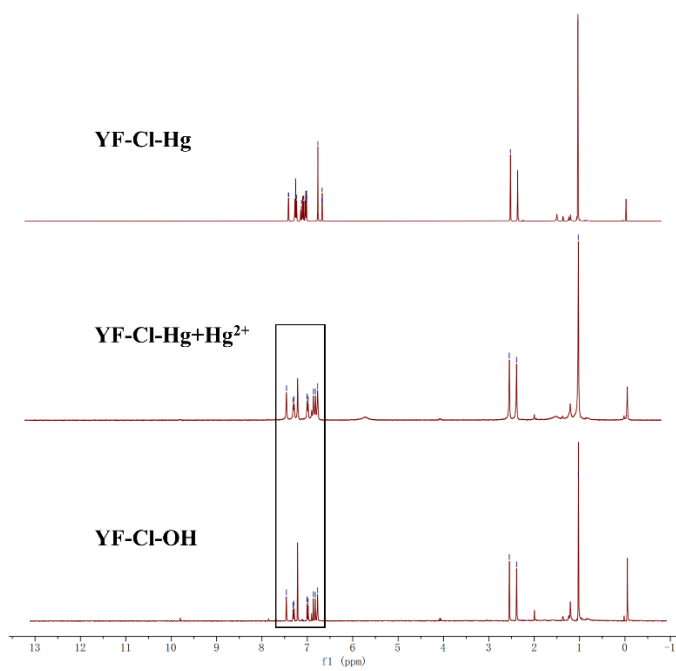

**Fig. S7** Comparison of  $^1\text{H}$  NMR **YF-Cl-Hg+Hg $^{2+}$**  with **YF-Cl-Hg** and **YF-Cl-OH**.

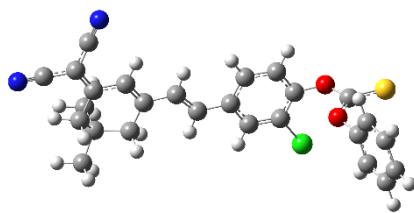

**Fig. S8** Structure of YF-Cl-Hg.

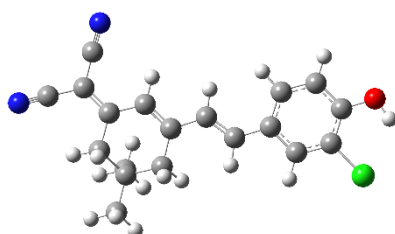

**Fig. S9** Structure of YF-Cl-OH.

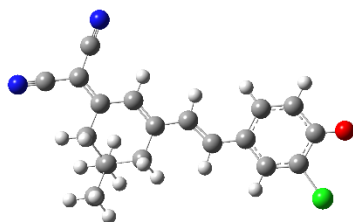

**Fig. S10** Structure of YF-Cl-O<sup>-</sup>.

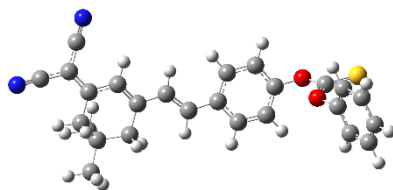

**Fig. S11** Structure of YF-Hg.

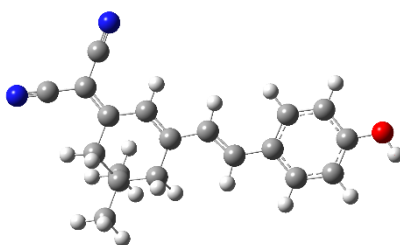

**Fig. S12** Structure of YF-OH.

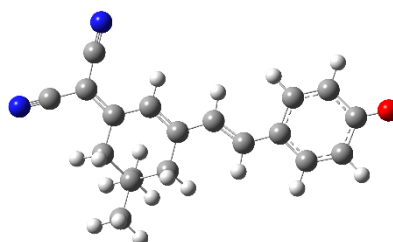

**Fig. S13** Structure of YF-O<sup>-</sup>.

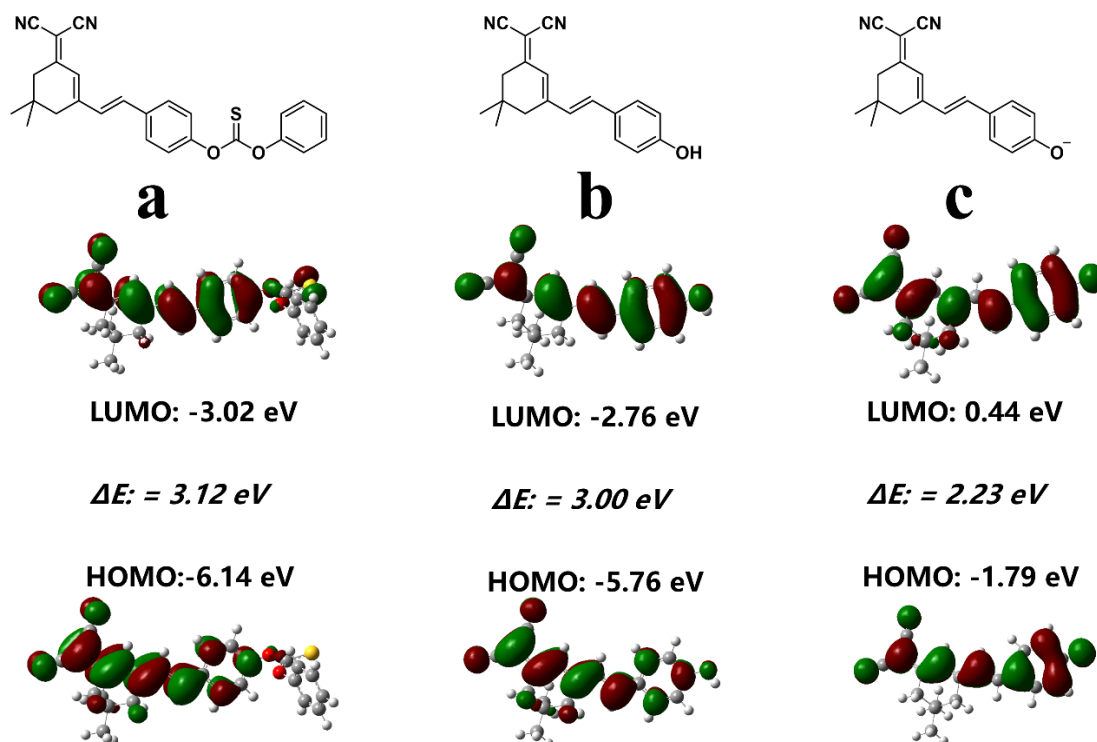

**Fig. S14** Molecular front orbital diagrams of YF-H-Hg, YF-H-OH and YF-H-O<sup>-</sup>.

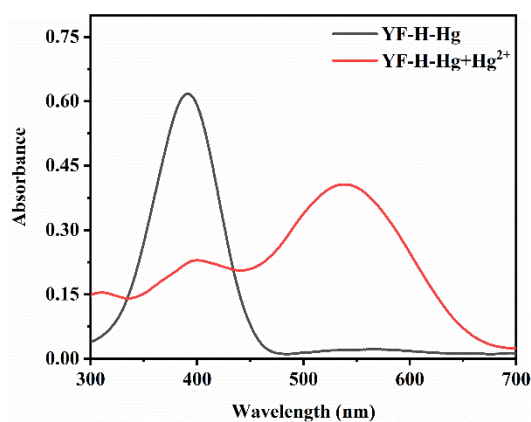

**Fig. S15** Absorption spectra of YF-Hg in pH buffer (pH=8, contained 50% DMF) in the absence and presence of Hg<sup>2+</sup> (100  $\mu$ M).

As shown in Fig. 3a, the UV absorption of YF-Hg after responding to Hg<sup>2+</sup> is only weakly red-shifted. It indicates that the HOMO-LUMO energy gap of its structure formed in response to Hg<sup>2+</sup> should be slightly reduced, which is basically consistent with the DFT calculation results in Fig S14.

Meanwhile, the UV absorption spectra of **YF-Hg** at pH=8 in response to  $\text{Hg}^{2+}$  were measured. As shown in Figure S15, there is a large red shift in the UV absorption of **YF-Hg** after responding to  $\text{Hg}^{2+}$  at pH=8, which implies the formation of a **YF-O<sup>-</sup>** structure.

**Table. S1** Comparison of **YF-CI-Hg** with other dithioacetal-based  $\text{Hg}^{2+}$  fluorescent probes.

| Probe                                                                               | References | LOD for $\text{Hg}^{2+}$    | Stocks shift (nm) | $\lambda_{\text{em}}$ | Cell imaging |
|-------------------------------------------------------------------------------------|------------|-----------------------------|-------------------|-----------------------|--------------|
| 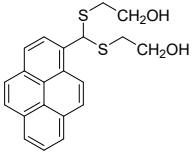   | 1          | $1.03 \times 10^{-9}$ mol/L | 62 nm             | 457 nm                | yes          |
|   | 2          | $5.0 \times 10^{-6}$ mol/L  | 112 nm            | 412 nm                | -            |
|  | 3          | $1.59 \times 10^{-8}$ mol/L | 103 nm            | 552 nm                | yes          |
|  | This work  | $5.82 \times 10^{-7}$ mol/L | 149 nm            | 659 nm                | yes          |

### Notes and references

1. Y. Y. Gao, T. T. Ma, Z. Z. Ou, W. J. Cai, G. Q. Yang, Y. Li, M. H. Xu and Q. Q. Li, *TALANTA*, 2018, **178**, 663-669.
2. J. Prabhu, K. Velmurugan and R. Nandhakumar, *Journal of Luminescence*, 2014, **145**, 733-736.
3. Y. Zhou, X. He, H. Chen, Y. Wang, S. Xiao, N. Zhang, D. Li and K. Zheng, *Sensors and Actuators B: Chemical*, 2017, **247**, 626-631.
